# Supplementary material
Source: PubMed Central journal article supplement (PMC4512548)
Supplement: 10.1534_115.176867_genetics.115.176867-1.pdf [file 10.1534_115.176867_genetics.115.176867-1.pdf]

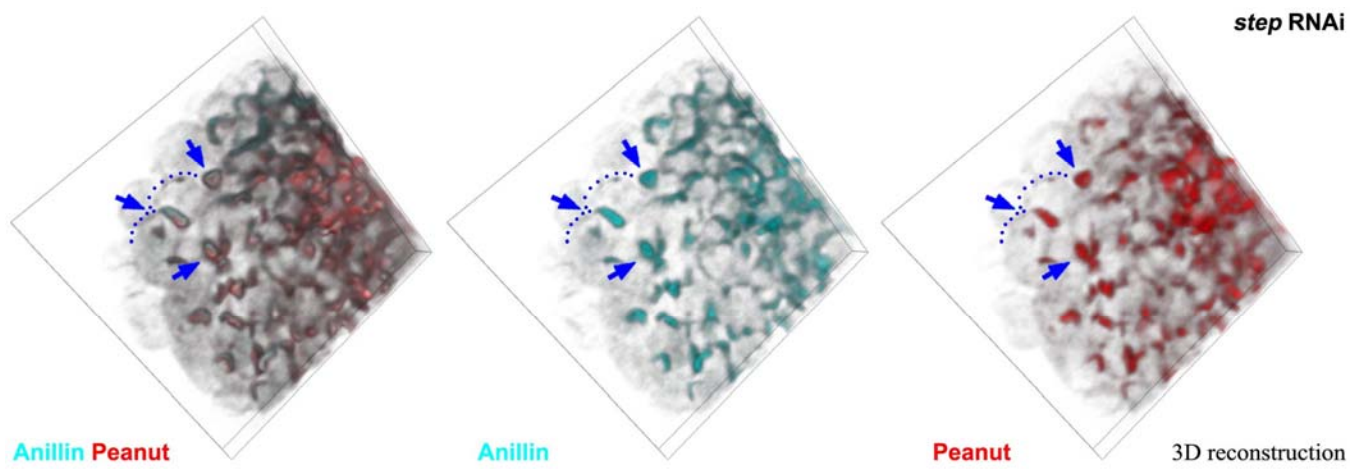

**Figure S1** Co-localization of cytoskeleton markers at cytokinetic rings within the abnormal anterior cells of *step* RNAi embryos. Anillin staining (Turquoise) is shown as in Fig. 1F but additionally with co-stained Peanut (Red).

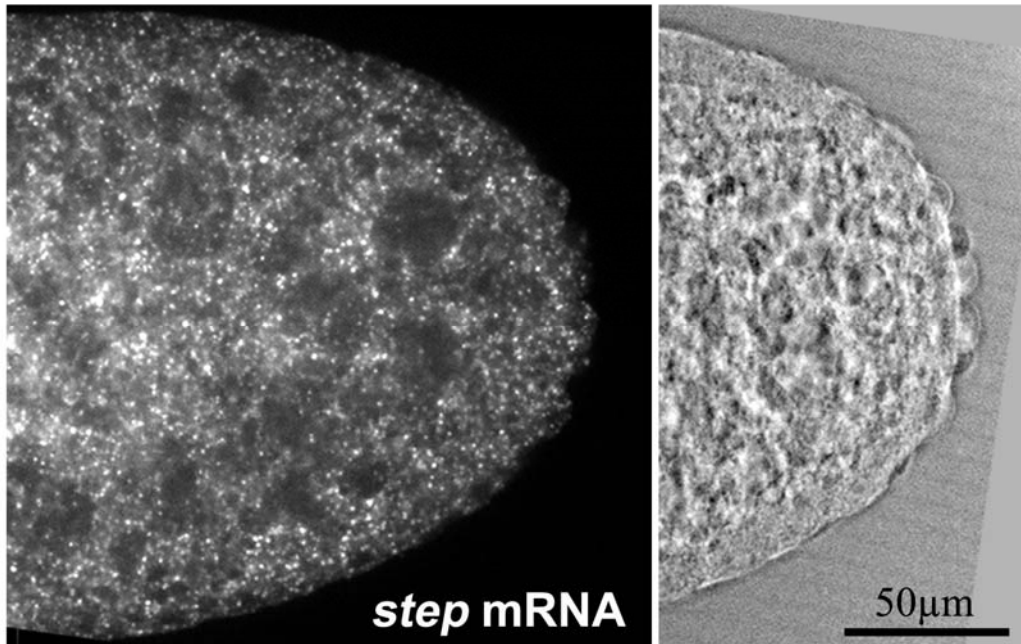

**Figure S2** *step* mRNA localization is indistinguishable between forming PGCs and the surrounding syncytial soma. Confocal imaging of fluorescent *in situ* hybridization of *step* mRNA in the posterior of an early syncytial embryo (nuclear cycle 10). The phase contrast image, right, shows the position of forming PGCs at the posterior pole. For the *in situ* image, left, note the indistinguishable *step* mRNA signal around the embryo periphery (for both the posterior pole where PGCs are forming and the surrounding soma). A greater interior signal is also present.

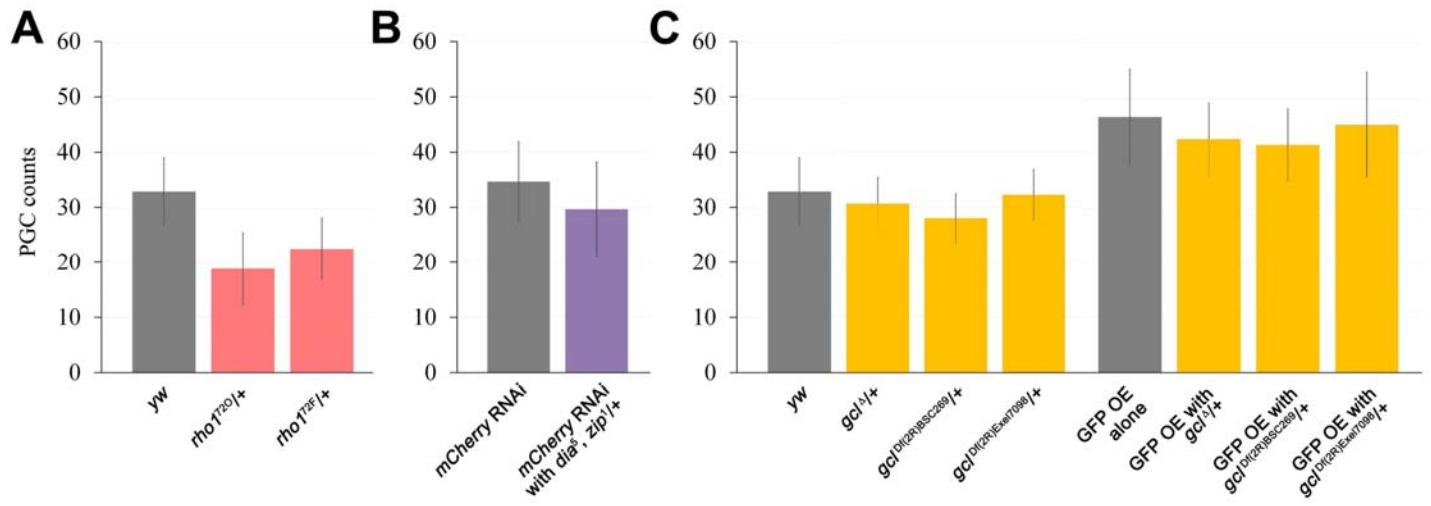

**Figure S3** PGC numbers at early blastoderm cellularization for various control genotypes. (A) Supplement to Fig. 3B. Each *rho1* heterozygote produced significantly fewer PGCs than control ( $p < .001$ ). (B) Supplement to Fig. 4B. (C) Supplement to Fig. 4B.

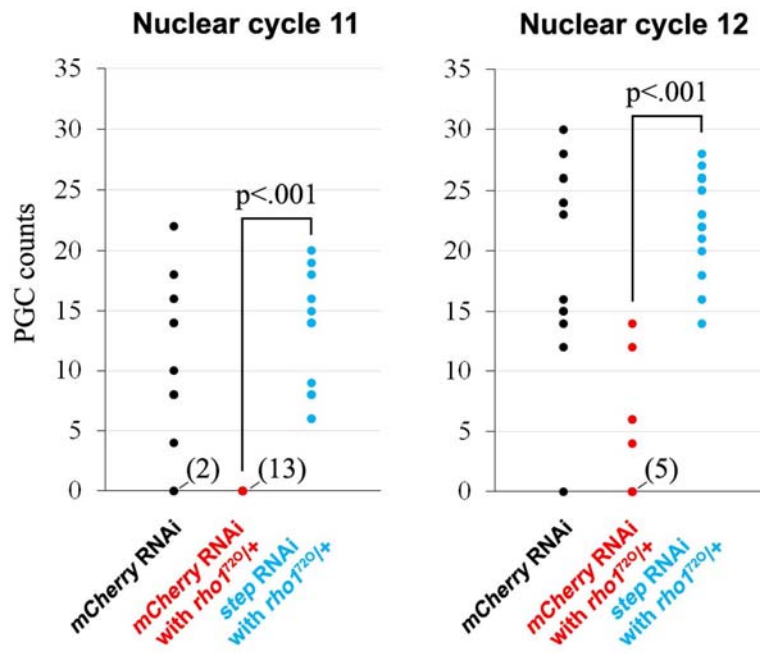

**Figure S4** *step* loss suppresses the loss of PGC numbers in *rho1* heterozygotes at nuclear cycles 11 and 12. Supplement to Fig. 3B. Each point represents one embryo and the numbers of embryos with zero PGCs are indicated in brackets.

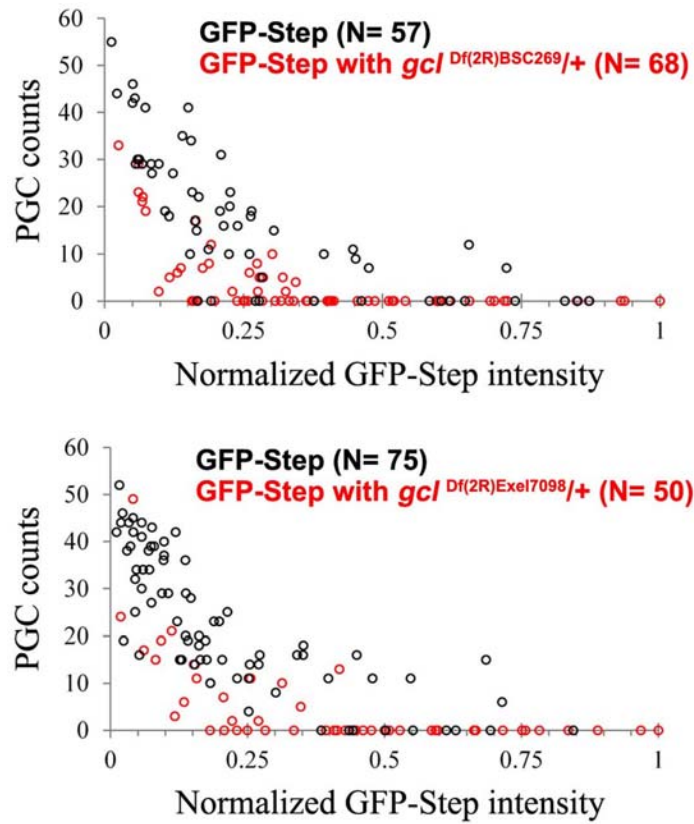

**Figure S5** Enhancement of the effects of Step over-expression on PGC numbers with two additional *gcl* perturbations. Supplement to Fig. 4B. In each case, the reduction of PGC counts was significant ( $p < .001$ ).

## Files S1-S2

Available for download as .avi files at  
[www.genetics.org/lookup/suppl/doi:10.1534/genetics.115.176867/-/DC1](http://www.genetics.org/lookup/suppl/doi:10.1534/genetics.115.176867/-/DC1)

**File S1** Live phase contrast imaging of a control (*mcherry* RNAi) embryo showing the normal posterior formation of PGCs (right) accompanied by minimal changes elsewhere around the embryo. Images were acquired once every 30 seconds, and the movie is shown at 8 frames/sec (240 times real-time).

**File S2** Live phase contrast imaging of a *step* RNAi embryo showing the normal posterior formation of PGCs (right) accompanied by abnormal anterior cell formation (left). Images were acquired once every 30 seconds, and the movie is shown at 8 frames/sec (240 times real-time).
