# Supplementary material
Source: PubMed Central journal article supplement (PMC4512548)
Supplement: 10.1534_115.176867_genetics.115.176867-2.pdf [file 10.1534_115.176867_genetics.115.176867-2.pdf]

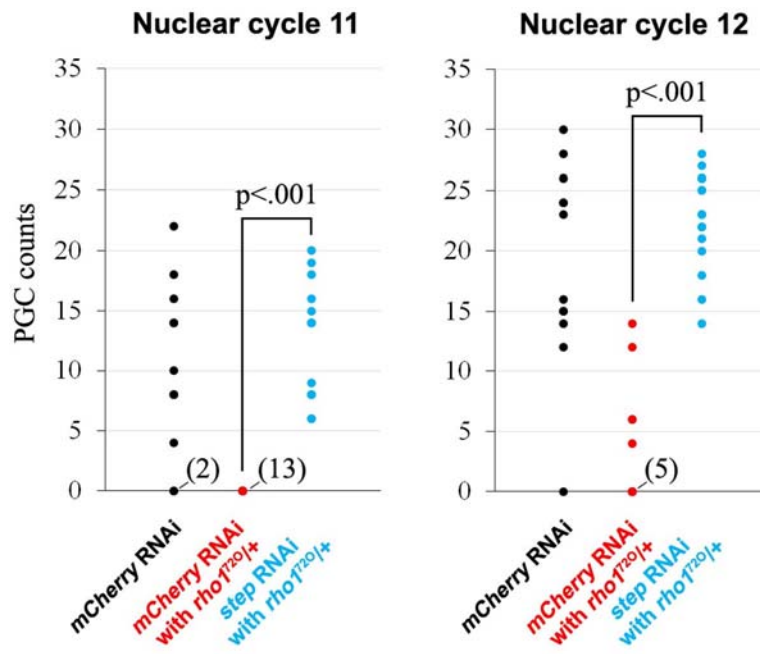

**Figure S4** *step* loss suppresses the loss of PGC numbers in *rho1* heterozygotes at nuclear cycles 11 and 12. Supplement to Fig. 3B. Each point represents one embryo and the numbers of embryos with zero PGCs are indicated in brackets.
