# Supplementary material
Source: PubMed Central journal article supplement (PMC4512548)
Supplement: 10.1534_115.176867_genetics.115.176867-4.pdf [file 10.1534_115.176867_genetics.115.176867-4.pdf]

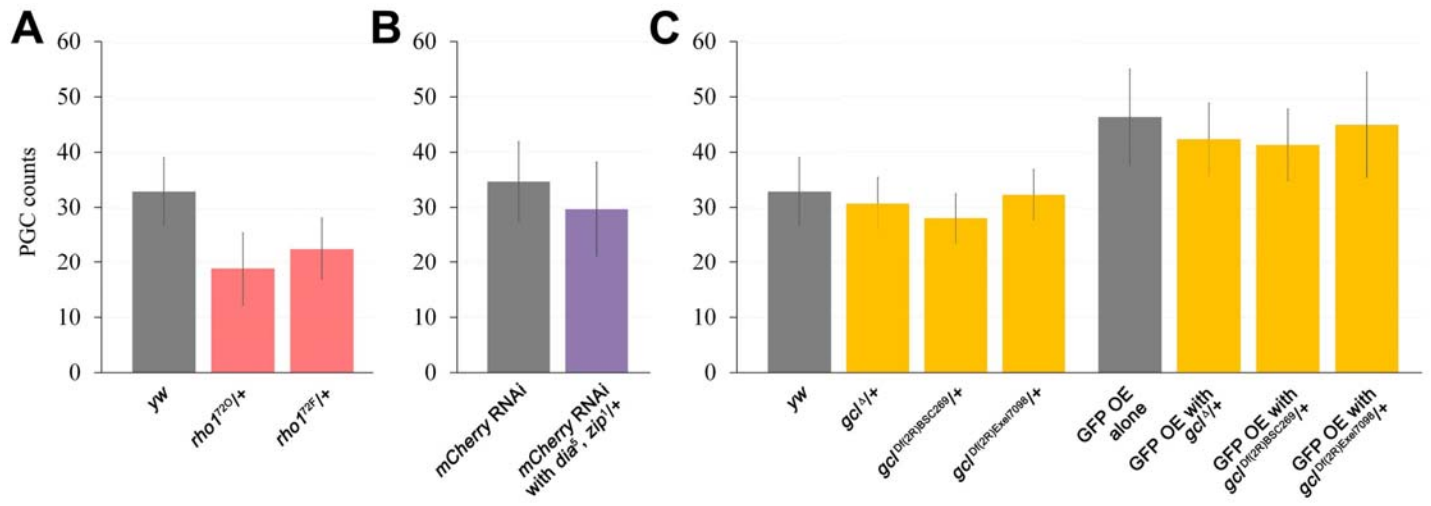

**Figure S3** PGC numbers at early blastoderm cellularization for various control genotypes. (A) Supplement to Fig. 3B. Each *rho1* heterozygote produced significantly fewer PGCs than control ( $p < .001$ ). (B) Supplement to Fig. 4B. (C) Supplement to Fig. 4B.
