# Supplementary material
Source: PubMed Central journal article supplement (PMC4512548)
Supplement: 10.1534_115.176867_genetics.115.176867-7.pdf [file 10.1534_115.176867_genetics.115.176867-7.pdf]

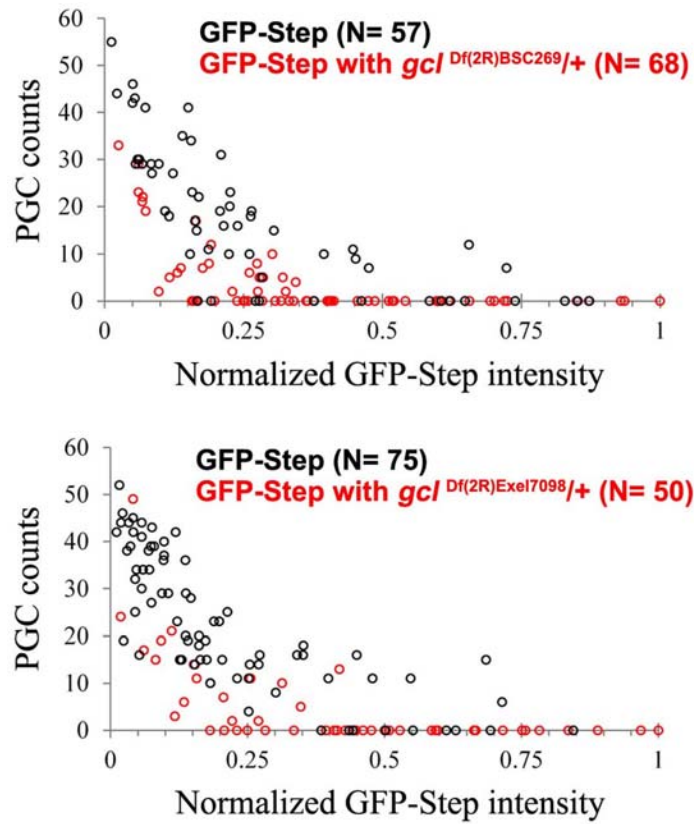

**Figure S5** Enhancement of the effects of Step over-expression on PGC numbers with two additional *gcl* perturbations. Supplement to Fig. 4B. In each case, the reduction of PGC counts was significant ( $p < .001$ ).
