# Supplementary material
Source: PubMed Central journal article supplement (PMC4512548)
Supplement: 10.1534_115.176867_genetics.115.176867-8.pdf [file 10.1534_115.176867_genetics.115.176867-8.pdf]

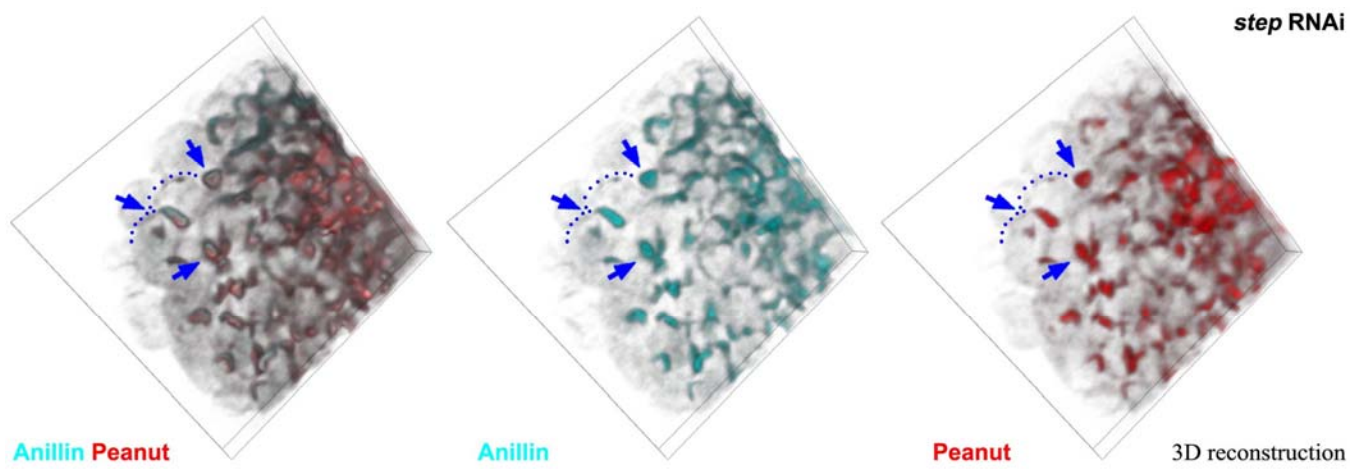

**Figure S1** Co-localization of cytoskeleton markers at cytokinetic rings within the abnormal anterior cells of *step* RNAi embryos. Anillin staining (Turquoise) is shown as in Fig. 1F but additionally with co-stained Peanut (Red).
